# Supplementary material for: Correlational Analysis of Genetic Mutations and Galectin Levels in Breast Cancer Patients
Source: Preprints.org preprint supplement (doi:10.20944/preprints202405.0666.v1), 2024-05-10
Supplement: Supplementary file 1 [file supplementary]

## Sheet: Galectin_Mutation_Data
FWID	Gal-1	Gal-3	Gal-9	Gender	Ethnicity	Race	Diagnosis	T	N	M	Stage	Histology	Specimen Type	Spec Considered	Tissue Site	Specimen age in years	Specimen Collection Year	Patient Birth Year	Age at Collection	Smoking History	Tissue Exposure	Rad Tissue Exposure	50 Gene Panel	Chemo	Hormonal Therapy	Immunotherapy	IHC Assay ER	IHC ER %	IHC Assay PR	IHC PR %	IHC Assay HER-2	FISH Test HER-2	Treatment Status	ER/PR/HER	HR/HER	Subtype	Grade	BMI	ABL1	ALK	AKT	APC	ATM	BRAF	CDHI	CDKN2A	CSf1R	CTNNB1	EGFR
100082	15.3825	14.5865	6.7605	Female	Non-Spanish; Non-Hispanic	White	Breast Cancer	T1c	N0		I	Invasive Ductal	Serum	Primary	Breast	8	2013	1940	73	Never smoked			Yes													LBHH	2	26	Wild Type	Wild Type	Wild Type	Wild Type	Wild Type	Wild Type	Wild Type	Wild Type	Wild Type	Wild Type	Wild Type
100110	16.93	10.28	4.761	Female	Non-Spanish; Non-Hispanic	White	Breast Cancer				IV	Lobular Carcinoma	Serum	Metastatic	Ovary	9	2012	1948	64	Previous smoker			Yes				positive	100	positive	84	Not Amplified					LUMA	3	20.4	Wild Type	Wild Type	Wild Type	Wild Type	Wild Type	Wild Type	Wild Type	Wild Type	Wild Type	Wild Type	Wild Type
100115	27.21	12.38	12.98	Female	Non-Spanish; Non-Hispanic	White	Breast Cancer				I	Invasive Ductal	Serum	Primary	Breast	8	2013	1945	68	Never smoked			Yes				positive	91	positive	95	Not Amplified					LUMA	3	43.53	Wild Type	Wild Type	Wild Type	Wild Type	Wild Type	Wild Type	Wild Type	Wild Type	Wild Type	Wild Type	Wild Type
100270	36.03	30.11	7.704	Female	Non-Spanish; Non-Hispanic	White	Breast Cancer	T1c	N0	M0	I	Invasive Ductal	Serum	Primary	Breast	8	2013	1941	72	Never smoked			Yes				positive	67	positive	80	Not Amplified					LUMA	2	29.7	Wild Type	Wild Type	Wild Type	Wild Type	Wild Type	Wild Type	Wild Type	Wild Type	Wild Type	Wild Type	Wild Type
100317	18.04	12.24	5.761	Female	Non-Spanish; Non-Hispanic	White	Breast Cancer	T2	N1a		II	Invasive Ductal	Serum	Primary	Breast	8	2013	1934	79	Never smoked			Yes				positive	98	positive	90	Not Amplified					LUMA	2	20.53	Wild Type	Wild Type	Wild Type	Wild Type	Wild Type	Wild Type	Wild Type	Wild Type	Wild Type	Wild Type	Wild Type
100435	16.88	19.75	5.818	Female	Non-Spanish; Non-Hispanic	Black, African American	Breast Cancer	T2	N0		II	Invasive Ductal	Serum	Primary	Breast	9	2012	1973	39	Previous smoker			Yes				positive	85	positive	38	Not Amplified					LUMA	2	33.2	Wild Type	Wild Type	Wild Type	Wild Type	Wild Type	Wild Type	Wild Type	Wild Type	Wild Type	Wild Type	Wild Type
101362	16.04	6.26		Female	Non-Spanish; Non-Hispanic	White	Breast Cancer	T1c	N1a		II	Ductal	Serum	Primary	Breast	8	2014	1945	69	Previous smoker	No	No	Yes				positive	83	positive	59	Amplified			+/+/+	HR+/HER+	LAHH			Wild Type	Wild Type	Wild Type	Wild Type	Wild Type	Wild Type	Wild Type	Wild Type	Wild Type	Wild Type	Wild Type
101600	26.74	4.08	10.39	Female	Non-Spanish; Non-Hispanic	White	Breast Cancer	T2	N1a		II	Ductal	Serum	Primary	Breast	7	2015	1972	43	Previous smoker	Yes	No	Yes	Yes			negative		negative		Not Amplified			-/-/-	HR-/HER-	Triple Negative			Wild Type	Wild Type	Mutated	Wild Type	Wild Type	Wild Type	Wild Type	Wild Type	Wild Type	Wild Type	Wild Type
101619	31.61	12.47	8.709	Female	Non-Spanish; Non-Hispanic	Black, African American	Breast Cancer	T2	N2a	M0	III	Ductal	Serum	Primary	Breast	7	2015	1935	80	Current smoker	No	No	Yes				positive	92	positive	95	Amplified	Amplified		+/+/+	HR+/HER+	LUMB			Wild Type	Wild Type	Wild Type	Wild Type	Wild Type	Wild Type	Wild Type	Wild Type	Wild Type	Wild Type	Wild Type
101649	29.51	11.24		Female	Non-Spanish; Non-Hispanic	White	Breast Cancer	T1c	N0	M0	I	Ductal	Serum	Primary	Breast	7	2015	1967	48	Current smoker	Yes	No	Yes	Yes			positive	91	positive	96	Amplified	Amplified	Neoadjuvant	+/+/+	HR+/HER+	LUMB			Wild Type	Wild Type	Wild Type	Mutated	Wild Type	Wild Type	Wild Type	Wild Type	Wild Type	Wild Type	Wild Type
101743	24.66	14.28	11.41	Female	Non-Spanish; Non-Hispanic	Black, African American	Breast Cancer	T2	N0	M0	II	Ductal	Serum	Primary	Breast	7	2015	1957	58	Never smoked	Yes	No	No	Yes			positive	46	positive	1	Amplified			+/+/+	HR+/HER+	LUMB			Wild Type	Wild Type	Wild Type	Wild Type	Wild Type	Wild Type	Wild Type	Wild Type	Wild Type	Wild Type	Wild Type
102039	31.45	11.32	11.08	Female	Non-Spanish; Non-Hispanic	White	Breast Cancer				II	Adenocarcinoma	Serum	Metastatic	Liver	7	2015	1952	63	Previous smoker	Yes	No	No	Yes			negative		negative		Not Amplified		Metastatic/Palliative	-/-/-	HR-/HER-	Triple Negative			Wild Type	Wild Type	Wild Type	Wild Type	Mutated	Wild Type	Wild Type	Wild Type	Wild Type	Wild Type	Wild Type
102133	27.67	4.405	6.279	Female	Non-Spanish; Non-Hispanic	Asian	Breast Cancer				II	Ductal	Serum	Primary	Breast	7	2015	1970	46	Never smoked	Yes	No	Yes	Yes			positive	74	positive	56	Not Amplified		Neoadjuvant	+/+/-	HR+/HER-	LUMA			Wild Type	Wild Type	Wild Type	Wild Type	Wild Type	Wild Type	Wild Type	Wild Type	Wild Type	Wild Type	Wild Type
102159	21.98	8.069		Female	Non-Spanish; Non-Hispanic	White	Breast Cancer	T2	N2a		III	Ductal	Serum	Primary	Breast	7	2015	1964	52	Current smoker			Yes				positive	79	positive	21	Not Amplified			+/+/-	HR+/HER-	LUMA			Wild Type	Wild Type	Wild Type	Wild Type	Wild Type	Wild Type	Wild Type	Wild Type	Wild Type	Wild Type	Wild Type
102166	19.09	3.658	8.632	Female	Non-Spanish; Non-Hispanic	White	Breast Cancer	T2	N3	M1	IV	Ductal	Serum	Primary	Breast	7	2015	1952	63	Never smoked	No	No	Yes				positive	95	positive	78	Not Amplified			+/+/-	HR+/HER-	LUMA			Wild Type	Wild Type	Wild Type	Wild Type	Wild Type	Wild Type	Wild Type	Wild Type	Wild Type	Wild Type	Wild Type
102199	27.78	9.887	10.41	Female	Non-Spanish; Non-Hispanic	White	Breast Cancer	T1b	N0	M0	I	Ductal	Serum	Primary	Breast	7	2015	1945	70	Never smoked	No	No	Yes				positive	95	positive		Amplified			+/+/+	HR+/HER+	LAHH			Wild Type	Wild Type	Wild Type	Wild Type	Wild Type	Wild Type	Wild Type	Wild Type	Wild Type	Wild Type	Wild Type
102205	24.7	7.876		Female	Non-Spanish; Non-Hispanic	White	Breast Cancer	T1c	N0	M0	I	Mucinous Adenocarcinoma	Serum	Primary	Breast	7	2015	1943	72	Never smoked	No	No	Yes				positive	89	positive	93	Not Amplified			+/+/-	HR+/HER-	LUMA			Wild Type	Wild Type	Wild Type	Wild Type	Wild Type	Wild Type	Wild Type	Wild Type	Wild Type	Wild Type	Wild Type
102247	46.09	37.75	17.96	Female	Non-Spanish; Non-Hispanic	White	Breast Cancer	T2	N2a		III	Invasive Ductal	Serum	Metastatic	Brain	6	2015	1945	70	Never smoked			Yes				negative		negative		Amplified					HER2 Enriched	U	36.63	Wild Type	Wild Type	Wild Type	Wild Type	Wild Type	Wild Type	Wild Type	Wild Type	Wild Type	Wild Type	Wild Type
102318	24.46	13.217	9.892	Female	Non-Spanish; Non-Hispanic	Black, African American	Breast Cancer	T2	N3	M0	III	Invasive Ductal	Serum	Primary	Breast	5	2016	1940	76	Never smoked							positive	100	positive	79	Not Amplified						2	32.03	Wild Type	Wild Type	Wild Type	Wild Type	Wild Type	Wild Type	Wild Type	Wild Type	Wild Type	Wild Type	Wild Type
102362	26.75	14.06		Female	Non-Spanish; Non-Hispanic	Black, African American	Breast Cancer	T1c	N0		I	Ductal	Serum	Primary	Breast	6	2015	1926	89	Previous smoker			Yes				positive	99	positive	71	Not Amplified	Not Amplified		+/+/-	HR+/HER-	LUMA			Wild Type	Wild Type	Wild Type	Wild Type	Wild Type	Wild Type	Wild Type	Mutated	Wild Type	Wild Type	Wild Type
102377	21.265	22.265	8.9985	Female	Non-Spanish; Non-Hispanic	White	Breast Cancer	T1b	N0	M0	I	Invasive Ductal	Serum	Primary	Breast	5	2016	1946	70	Never smoked			Yes				negative		negative		Not Amplified						2	21.62	Wild Type	Wild Type	Wild Type	Wild Type	Wild Type	Wild Type	Wild Type	Wild Type	Wild Type	Wild Type	Wild Type
102378	21.61	11.34		Female	Non-Spanish; Non-Hispanic	White	Breast Cancer	T1b	N0	M0	I	Ductal	Serum	Primary	Breast	6	2015	1948	68	Never smoked			Yes				positive	98	positive	95	Not Amplified			+/+/-	HR+/HER-	LUMA			Wild Type	Wild Type	Wild Type	Wild Type	Wild Type	Wild Type	Wild Type	Wild Type	Wild Type	Wild Type	Wild Type
102395	17.7	7.906		Female	Non-Spanish; Non-Hispanic	White	Breast Cancer	T2	N0	M0	II	Ductal	Serum	Primary	Breast	6	2015	1954	61	Previous smoker			Yes				positive	90	negative		Not Amplified			+/-/-	HR+/HER-	LUMA			Wild Type	Wild Type	Wild Type	Wild Type	Wild Type	Wild Type	Wild Type	Wild Type	Wild Type	Wild Type	Wild Type
102407	19.33	12.85	10.57	Female	Non-Spanish; Non-Hispanic	Black, African American	Breast Cancer	T4a	N3	M0	III	Invasive Ductal	Serum	Primary	Breast	6	2015	1968	47	Never smoked			Yes				negative		negative		Not Amplified					Triple Negative	3	30.7	Wild Type	Wild Type	Wild Type	Wild Type	Wild Type	Wild Type	Wild Type	Wild Type	Wild Type	Wild Type	Wild Type
102416	31.76	30.46	13.57	Female	Non-Spanish; Non-Hispanic	White	Breast Cancer	T1b	N0		I	Invasive Ductal	Serum	Primary	Breast	6	2015	1940	75	Never smoked			Yes				positive	95	positive	36	Equivocal					LUMA	3	34.2	Wild Type	Wild Type	Wild Type	Wild Type	Wild Type	Wild Type	Wild Type	Wild Type	Wild Type	Wild Type	Wild Type
102418	35.15	13.5	10.31	Female	Non-Spanish; Non-Hispanic	White	Breast Cancer	T1b	N0		I	Invasive Ductal	Serum	Primary	Breast	5	2016	1929	87	Never smoked			Yes				positive	97	positive	98	Amplified					LAHH	3	27.59	Wild Type	Wild Type	Wild Type	Wild Type	Wild Type	Wild Type	Wild Type	Wild Type	Wild Type	Wild Type	Wild Type
102453	15.8925	9.0205	5.7575	Female	Non-Spanish; Non-Hispanic	White	Breast Cancer	T1c	N0	M0	I	Invasive Ductal	Serum	Primary	Breast	5	2016	1959	57	Current smoker			Yes				positive	92	positive	96	Not Amplified						1	31.3	Wild Type	Wild Type	Wild Type	Wild Type	Wild Type	Wild Type	Wild Type	Wild Type	Wild Type	Wild Type	Wild Type
102471	13.82	12.43	5.481	Female	Non-Spanish; Non-Hispanic	White	Breast Cancer	T1c	N0	M0	I	Invasive Ductal	Serum	Recurrence	Breast	6	2015	1948	67	Previous smoker			Yes				negative		negative		Not Amplified					Triple Negative	3	21.5	Wild Type	Wild Type	Wild Type	Wild Type	Wild Type	Wild Type	Wild Type	Wild Type	Wild Type	Wild Type	Wild Type
102478	11.02	13.76	4.123	Female	Spanish; Hispanic	Latino	Breast Cancer	T2	N0	M0	II	Invasive Ductal	Serum	Primary	Breast	5	2016	1973	43	Never smoked			Yes				negative		negative		Not Amplified					Triple Negative	3	24.42	Wild Type	Wild Type	Wild Type	Wild Type	Wild Type	Wild Type	Wild Type	Wild Type	Wild Type	Wild Type	Wild Type
102485	25.28	13.83	8.215	Female	Non-Spanish; Non-Hispanic	White	Breast Cancer	T1c	N1a	M0	III	Invasive Ductal	Serum	Primary	Breast	6	2015	1959	56	Current smoker			Yes				positive	98	positive	49	Not Amplified					LUMA	1	27.1	Wild Type	Wild Type	Wild Type	Wild Type	Wild Type	Wild Type	Wild Type	Wild Type	Wild Type	Wild Type	Wild Type
102528	29.14	22.64	10.84	Female	Non-Spanish; Non-Hispanic	White	Breast Cancer	T2	N0	M0	II	Invasive Ductal	Serum	Primary	Breast	6	2015	1961	54	Previous smoker			Yes				negative		negative		Not Amplified					Triple Negative	3	33.1	Wild Type	Wild Type	Wild Type	Wild Type	Wild Type	Wild Type	Wild Type	Wild Type	Wild Type	Wild Type	Wild Type
102547	14.77	6.712		Female	Non-Spanish; Non-Hispanic	White	Breast Cancer	T2	N1	M0	II	Ductal	Serum	Primary	Breast	6		1963	53	Previous smoker	No	No	Yes				positive	59	negative		Not Amplified			+/-/-	HR+/HER-	LUMB		21	Wild Type	Wild Type	Wild Type	Wild Type	Wild Type	Wild Type	Wild Type	Wild Type	Wild Type	Wild Type	Wild Type
102548	22.61	16.39	5.386	Female	Non-Spanish; Non-Hispanic	White	Breast Cancer	T2	N0	M0	II	Invasive Ductal	Serum	Primary	Breast	6	2015	1977	38	Never smoked			Yes				positive	89	positive	49	Not Amplified					LUMA	1	35.47	Wild Type	Wild Type	Wild Type	Wild Type	Wild Type	Wild Type	Wild Type	Wild Type	Wild Type	Wild Type	Wild Type
102628	12.94	3.984		Female	Non-Spanish; Non-Hispanic	White	Breast Cancer	T1c	N0		I	Ductal	Serum	Primary	Breast	6	2016	1961	55	Never smoked	No	No	Yes				positive	72	positive	67	Not Amplified	Not Amplified		+/+/-	HR+/HER-	LUMA		22	Wild Type	Wild Type	Wild Type	Mutated	Wild Type	Wild Type	Wild Type	Wild Type	Wild Type	Wild Type	Wild Type
102687	24.36	23.94	14.86	Female	Non-Spanish; Non-Hispanic	White	Breast Cancer	T2	N0	M0	II	Invasive Ductal	Serum	Primary	Breast	6	2015	1967	48	Never smoked							positive	100	positive	86	Amplified						1	30.51	Wild Type	Wild Type	Wild Type	Wild Type	Wild Type	Wild Type	Wild Type	Wild Type	Wild Type	Wild Type	Wild Type
102689	17.14	16.16	9.189	Female	Non-Spanish; Non-Hispanic	White	Breast Cancer	T2	N0		I	Apocrine	Serum	Recurrence	Breast	6	2016	1938	77	Never smoked	Yes	Yes	Yes				negative		negative		Amplified		Neoadjuvant	-/-/+	HR-/HER+	HER2 Enriched			Wild Type	Wild Type	Wild Type	Wild Type	Wild Type	Wild Type	Wild Type	Wild Type	Mutated	Wild Type	Wild Type
102693	25.38	18.05	11.87	Female	Non-Spanish; Non-Hispanic	White	Breast Cancer	T1b	N0		I	Adenocarcinoma	Serum	Primary	Lymph Node	5	2016	1944	72	Previous smoker			Yes				positive	97	positive	2	Not Amplified					LUMA	U	24.9	Wild Type	Wild Type	Wild Type	Wild Type	Mutated	Wild Type	Wild Type	Wild Type	Wild Type	Wild Type	Wild Type
102697	22.46	16.56	4.65	Female	Non-Spanish; Non-Hispanic	White	Breast Cancer	T2	N0	M0	II	Invasive Ductal	Serum	Primary	Breast	6	2015	1962	53	Never smoked			Yes				positive	100	positive	65	Not Amplified					LUMA	2	21.64	Wild Type	Wild Type	Wild Type	Wild Type	Wild Type	Wild Type	Wild Type	Wild Type	Wild Type	Wild Type	Wild Type
102716	21.59	10.9	7.286	Female	Non-Spanish; Non-Hispanic	White	Breast Cancer	T3	N1	M0	III	Invasive Ductal	Serum	Primary	Breast	6	2015	1956	59	Previous smoker			Yes				positive	100	positive	100	Not Amplified					LUMA	3	33.49	Wild Type	Wild Type	Mutated	Wild Type	Wild Type	Wild Type	Wild Type	Wild Type	Wild Type	Wild Type	Wild Type
102745	30.57	19.59	11.82	Female	Non-Spanish; Non-Hispanic	Black, African American	Breast Cancer	T3	N2a		III	Invasive Mammary	Serum	Primary	Breast	5	2016	1969	47	Current smoker			Yes				positive	92	positive	84	Not Amplified					LUMA	2	35.53	Wild Type	Wild Type	Wild Type	Wild Type	Wild Type	Wild Type	Wild Type	Wild Type	Wild Type	Wild Type	Wild Type
102794	23.74	7.116	9.089	Female	Non-Spanish; Non-Hispanic	White	Breast Cancer	T2	N1	M0	II	Ductal	Serum	Metastatic	Axillary	6	2016	1964	51	Never smoked	No	No	Yes				positive	40	negative		Not Amplified	Not Amplified		+/-/-	HR+/HER-	LUMB			Wild Type	Wild Type	Wild Type	Wild Type	Wild Type	Wild Type	Wild Type	Wild Type	Wild Type	Wild Type	Wild Type
102805	15.24	9.086		Female	Non-Spanish; Non-Hispanic	Black, African American	Breast Cancer	T1	N0	M0	I	Ductal	Serum	Recurrence	Chest Wall	6	2016	1971	46	Previous smoker	No	No	Yes				negative		negative		Not Amplified			-/-/-	HR-/HER-	Triple Negative			Wild Type	Wild Type	Wild Type	Wild Type	Wild Type	Wild Type	Wild Type	Wild Type	Wild Type	Wild Type	Wild Type
102825	24.97	22.42	8.877	Female	Non-Spanish; Non-Hispanic	White	Breast Cancer	T2	N0	M0	II	Invasive Mammary	Serum	Primary	Breast	5	2016	1940	76	Never smoked			Yes				positive	97	positive	46	Not Amplified					LUMA	2	20.2	Wild Type	Wild Type	Wild Type	Wild Type	Wild Type	Wild Type	Wild Type	Wild Type	Wild Type	Wild Type	Wild Type
102946	13.61	8.943		Female	Non-Spanish; Non-Hispanic	White	Breast Cancer	T2	N1a		II	Apocrine	Serum	Primary	Breast	6	2016	1971	45	Never smoked	Yes	No	Yes				positive	96	positive	97	Not Amplified		Hormone Only	+/+/-	HR+/HER-	LUMA			Wild Type	Wild Type	Wild Type	Wild Type	Wild Type	Wild Type	Wild Type	Wild Type	Wild Type	Wild Type	Wild Type
102996	14.02	6.059		Female	Non-Spanish; Non-Hispanic	White	Breast Cancer	T2	N0	M0	II	Ductal	Serum	Primary	Breast	6	2016	1997	19	Never smoked	No	No	Yes				positive	83	positive	35	Amplified	Amplified		+/+/+	HR+/HER+	LAHH			Wild Type	Wild Type	Wild Type	Wild Type	Wild Type	Wild Type	Wild Type	Wild Type	Wild Type	Wild Type	Wild Type
103066	27.85	7.562		Female	Non-Spanish; Non-Hispanic	White	Breast Cancer	T2	N1	M0	II	Ductal	Serum	Primary	Breast	6	2016	1965	52	Previous smoker	Yes	No	Yes				positive	100	positive	100	Not Amplified		Neoadjuvant	+/+/-	HR+/HER-	LUMA		36.01	Wild Type	Wild Type	Wild Type	Wild Type	Wild Type	Wild Type	Wild Type	Wild Type	Wild Type	Wild Type	Wild Type
103308	17.9	11.36	7.576	Female	Non-Spanish; Non-Hispanic	White	Breast Cancer	T2	N0		II	Invasive Ductal	Serum	Primary	Breast	4	2017	1948	69	Previous smoker			Yes				positive	94	positive	85	Not Amplified					LUMA	2	22.62	Wild Type	Wild Type	Wild Type	Wild Type	Mutated	Wild Type	Wild Type	Wild Type	Wild Type	Wild Type	Wild Type
103360	26.76	9.644		Female	Non-Spanish; Non-Hispanic	Black, African American	Breast Cancer	T1b	N0	M0	I	Mucinous	Serum	Primary	Breast	5	2017	1969	48	Never smoked	Yes	No	Yes				positive	99	positive	99	Not Amplified		Hormone Only	+/+/-	HR+/HER-	LUMA			Wild Type	Wild Type	Wild Type	Wild Type	Wild Type	Wild Type	Wild Type	Wild Type	Wild Type	Wild Type	Wild Type
103389	36.8	11.61		Female	Non-Spanish; Non-Hispanic	White	Breast Cancer	T3	N0	M0	II	Apocrine	Serum	Primary	Breast	5	2017	1964	53	Current smoker	Yes	No	Yes				positive	40	negative		Not Amplified		Neoadjuvant	+/-/-	HR+/HER-	LUMB			Wild Type	Wild Type	Wild Type	Wild Type	Wild Type	Wild Type	Wild Type	Wild Type	Wild Type	Wild Type	Wild Type
103425	13.47	7.555		Female	Non-Spanish; Non-Hispanic	Asian	Breast Cancer	T1	N0		I	Apocrine	Serum	Primary	Breast	5	2017	1967	50	Never smoked	No	No	Yes				positive	96.5	positive	98.7	Not Amplified			+/+/-	HR+/HER-	LUMA			Wild Type	Wild Type	Wild Type	Wild Type	Wild Type	Wild Type	Wild Type	Wild Type	Wild Type	Wild Type	Wild Type
103518	27.29	11.85	7.001	Female	Non-Spanish; Non-Hispanic	White	Breast Cancer	T1c	N2a		III	Invasive Mammary	Serum	Primary	Breast	5	2016	1974	42	Previous smoker			Yes				positive	82	positive	62	Not Amplified					LUMA	2	35.27	Wild Type	Wild Type	Wild Type	Wild Type	Wild Type	Wild Type	Wild Type	Wild Type	Wild Type	Wild Type	Wild Type
103527	18.59	6.837	9.573	Female	Spanish; Hispanic	Latino	Breast Cancer	T1c	N0	M0	I	Apocrine	Serum	Primary	Breast	5	2017	1963	53	Never smoked	No	No	Yes				positive	93	positive	78	Not Amplified			+/+/-	HR+/HER-	LUMA			Wild Type	Wild Type	Wild Type	Wild Type	Wild Type	Wild Type	Wild Type	Wild Type	Wild Type	Wild Type	Wild Type
103541	23.41	17.87	10.62	Female	Non-Spanish; Non-Hispanic	Black, African American	Breast Cancer	T2	N0	M0	II	Invasive Mammary	Serum	Primary	Breast	4	2017	1945	72	Previous smoker			Yes				negative		negative		Not Amplified					Triple Negative	3	29.8	Wild Type	Wild Type	Wild Type	Mutated	Wild Type	Wild Type	Wild Type	Wild Type	Wild Type	Wild Type	Wild Type
103623	22.68	31.51	12.57	Female	Non-Spanish; Non-Hispanic	White	Breast Cancer				IV	Carcinoma	Serum	Metastatic	Brain	4	2017	1953	64	Never smoked			Yes				negative		positive	7	Equivocal					LUMB	U	33.95	Wild Type	Wild Type	Wild Type	Wild Type	Wild Type	Wild Type	Wild Type	Wild Type	Wild Type	Wild Type	Wild Type
103627	22.72	8.677		Female	Non-Spanish; Non-Hispanic	White	Breast Cancer	T2	N0	M0	II	Apocrine	Serum	Primary	Breast	5	2017	1958	59	Previous smoker	Yes	No	Yes	Yes			negative		negative		Not Amplified		Neoadjuvant	-/-/-	HR-/HER-	Triple Negative			Wild Type	Wild Type	Wild Type	Wild Type	Wild Type	Wild Type	Wild Type	Wild Type	Wild Type	Wild Type	Wild Type
103639	16.28	7.501	6.399	Female	Non-Spanish; Non-Hispanic	White	Breast Cancer	T2			II	Adenocarcinoma	Serum	Metastatic	Brain	5	2017	1970	47	Never smoked	No	Yes	Yes	No	No	No	negative		negative		Not Amplified			-/-/-	HR-/HER-	Triple Negative			Wild Type	Wild Type	Wild Type	Wild Type	Wild Type	Wild Type	Wild Type	Wild Type	Wild Type	Wild Type	Wild Type
103678	23.17	2.763	9.598	Female	Non-Spanish; Non-Hispanic	White	Breast Cancer				II	Apocrine	Serum	Metastatic	Breast	5	2017	1936	80	Never smoked	No	No	Yes				negative		negative		Not Amplified	Not Amplified		-/-/-	HR-/HER-	Triple Negative			Mutated	Wild Type	Wild Type	Wild Type	Wild Type	Wild Type	Wild Type	Wild Type	Wild Type	Wild Type	Wild Type
103694	20.27	15.02	5.672	Female	Non-Spanish; Non-Hispanic	White	Breast Cancer				IV	Adenocarcinoma	Serum	Metastatic	Liver	4	2017	1984	33	Previous smoker			Yes				positive	67	positive	19	Not Amplified					LUMA	U	41.3	Wild Type	Wild Type	Wild Type	Wild Type	Wild Type	Wild Type	Wild Type	Wild Type	Wild Type	Wild Type	Wild Type
103792	35.34	18.15	12.28	Female	Non-Spanish; Non-Hispanic	White	Breast Cancer	T1c	N0	M0	I	Invasive Ductal	Serum	Primary	Breast	5	2016	1932	84	Previous smoker			Yes				positive	89	positive	95	Not Amplified					LUMA	1	39.59	Wild Type	Wild Type	Wild Type	Wild Type	Wild Type	Wild Type	Wild Type	Wild Type	Wild Type	Wild Type	Wild Type
103842	15.23	13.65	4.761	Female	Non-Spanish; Non-Hispanic	White	Breast Cancer	T2	N1	M1	IV	Invasive Ductal	Serum	Primary	Breast	4	2017	1977	40	Never smoked			Yes				positive	2	positive	13	Amplified					LBHH	3	23.8	Wild Type	Wild Type	Wild Type	Wild Type	Wild Type	Wild Type	Wild Type	Wild Type	Wild Type	Wild Type	Wild Type
103993	21.64	15.17	7.876	Female	Non-Spanish; Non-Hispanic	Black, African American	Breast Cancer	T3	N1		III	Invasive Ductal	Serum	Primary	Breast	3	2018	1948	70	Previous smoker			Yes				positive	97	positive	92	Amplified					LAHH	2	28.8	Wild Type	Wild Type	Wild Type	Wild Type	Wild Type	Wild Type	Wild Type	Wild Type	Wild Type	Wild Type	Wild Type
104159	34.26	18.33	13.06				Breast Cancer	T1c	N1a		II	Lobular	Serum	Primary	Breast	5	2017			Previous smoker	Yes	No	Yes				positive	73	positive	72	Not Amplified		Adjuvant	+/+/-	HR+/HER-	LUMA		36.73	Wild Type	Wild Type	Wild Type	Wild Type	Wild Type	Wild Type	Wild Type	Wild Type	Wild Type	Wild Type	Wild Type
104179	27.22	11.56	12.39	Female	Non-Spanish; Non-Hispanic	White	Breast Cancer	T3c	N0	M0	II	Lobular	Serum	Primary	Breast	5	2017	1960	58	Current smoker	No	No	Yes				positive	78	positive	43	Not Amplified			+/+/-	HR+/HER-	LUMA			Wild Type	Wild Type	Wild Type	Wild Type	Wild Type	Wild Type	Wild Type	Wild Type	Wild Type	Wild Type	Wild Type
104251	31.5	11.27	9.867	Female	Non-Spanish; Non-Hispanic	White	Breast Cancer	T2			II	Lobular	Serum	Primary	Breast	4	2017	1935	82	Never smoked			Yes				positive	83	negative		Not Amplified	Not Amplified		+/-/-	HR+/HER-	LUMA		22.14	Wild Type	Wild Type	Wild Type	Wild Type	Wild Type	Wild Type	Wild Type	Wild Type	Wild Type	Wild Type	Wild Type
104347	30	14.48		Female	Spanish; Hispanic	Latino	Breast Cancer	T1c	N1		I	Apocrine	Serum	Primary	Breast	4	2017	1962	55	Previous smoker	No	No	Yes				positive	85	positive	86	Not Amplified			+/+/-	HR+/HER-	LUMA			Wild Type	Wild Type	Wild Type	Wild Type	Wild Type	Wild Type	Wild Type	Wild Type	Wild Type	Wild Type	Wild Type
104415	27.58	23.62	9.638	Female	Non-Spanish; Non-Hispanic	Black, African American	Breast Cancer	T3	N2a		III	Invasive Micropapillary	Serum	Primary	Breast	4	2017	1958	59	Previous smoker			Yes				positive	85	positive	34	Amplified					LAHH	3	25.99	Wild Type	Wild Type	Wild Type	Wild Type	Wild Type	Wild Type	Wild Type	Mutated	Wild Type	Wild Type	Wild Type
104419	23.61	12.67		Female	Non-Spanish; Non-Hispanic	White	Breast Cancer	T1	N0	M0	I	Ductal	Serum	Primary	Breast	4	2018	1946	72	Current smoker	No	Yes	Yes				positive	100	positive	70	Not Amplified			+/+/-	HR+/HER-	LUMA			Wild Type	Wild Type	Wild Type	Wild Type	Wild Type	Wild Type	Wild Type	Wild Type	Wild Type	Wild Type	Wild Type
104449	36.45	5.873		Female	Non-Spanish; Non-Hispanic	White	Breast Cancer	T1c	N0	M0	I	Ductal	Serum	Primary	Breast	4	2018	1952	65	Never smoked	No	No	Yes				positive	15	positive	2	Not Amplified			+/+/-	HR+/HER-	LUMB			Wild Type	Wild Type	Wild Type	Wild Type	Wild Type	Wild Type	Wild Type	Wild Type	Wild Type	Wild Type	Wild Type
104509	30.51	16.9	16.66	Female	Non-Spanish; Non-Hispanic	White	Breast Cancer				IV	Invasive Ductal	Serum	Recurrence	Breast	4	2017	1980	37	Never smoked			Yes				positive	89	negative		Not Amplified					LUMA	3	27.2	Wild Type	Wild Type	Wild Type	Wild Type	Wild Type	Wild Type	Wild Type	Wild Type	Wild Type	Wild Type	Wild Type
104625	16.45	9.326	3.556	Female	Non-Spanish; Non-Hispanic	White	Breast Cancer	T4			III	Invasive Lobular	Serum	Primary	Breast	4	2017	1956	61	Never smoked			Yes				positive	65	positive	72	Not Amplified					LUMB	2	29.15	Wild Type	Wild Type	Wild Type	Wild Type	Wild Type	Wild Type	Wild Type	Wild Type	Wild Type	Wild Type	Wild Type
113556	26.07	10.67		Female	Non-Spanish; Non-Hispanic	White	Breast Cancer	T3	N0	M0	III	Metaplastic	Serum	Primary	Breast		2022	1961	61	Current smoker	No	No	No	No	No	No	negative		negative		Not Amplified			-/-/-	HR-/HER-	Triple Negative			Wild Type	Wild Type	Wild Type	Wild Type	Mutated	Wild Type	Wild Type	Wild Type	Wild Type	Wild Type	Wild Type
[truncated: 89 more columns]
